# Supplementary material
Source: HighWire-hosted journal article supplement (https://bmjopen.bmj.com/content/7/4/e014004)
Supplement: inline-supplementary-material-1 [file inline-supplementary-material-1.pdf]

**Table S1** Characters of literature between overweight/obesity and precocious puberty

| Author                 | Year      | Sample size | Age         | Ethnic                                                                          | Design                | Country | Definition of overweight/obesity                              | Definition of precocious puberty/early puberty                                                                             | Association of obesity and precocious puberty                                                                                                                                                                                                                                 |
|------------------------|-----------|-------------|-------------|---------------------------------------------------------------------------------|-----------------------|---------|---------------------------------------------------------------|----------------------------------------------------------------------------------------------------------------------------|-------------------------------------------------------------------------------------------------------------------------------------------------------------------------------------------------------------------------------------------------------------------------------|
| Current study          | 2014      | 17620       | 6-12 years  | Chinese                                                                         | Cross-sectional study | China   | WHO<br>Overweight: BMI $\geq$ 1SD,<br>Obesity: BMI $\geq$ 2SD | Girls: breast Tanner stage 2 or above before 8 year old;<br><br>Boys: Testicular volume $\geq$ 4 ml before 9 year old;     | Prevalence of precocious puberty in 4.17% boys and 48.54% girls with overweight; 4.85% boys and 61.86% girls with obesity; Prevalence of overweight in 22.05% boys and 26.01% girls with precocious puberty; 25.98% boys and 13.76% girls for obesity with precocious puberty |
| Adair LS <i>et al.</i> | 1988-1991 | 6507 girls  | 12-17 years | 54.8% non-Hispanic White, 21.1% non-Hispanic Black, 17.0% Hispanic, 7.1% Asian; | Longitudinal study    | America | Overweight: BMI $\geq$ 85th percentile;                       | Age at menarche: maturing early (younger than 11 years average); maturing late (11–13); maturing late (14 years or older); | Prevalence of overweight was 41.5%, 25% and 18.7% in early, average and late maturing girls respectively.                                                                                                                                                                     |
| Atay Z <i>et al.</i>   | 2009      | 820 girls   | 4-8 years   | -                                                                               | Cross-sectional study | Turkey  | BMI standard deviation scores (SDS)                           | Premature thelarche (PT); Premature pubarche (PP)                                                                          | 56.1% girls were PT with BMI SDS values above 1 in the PT group; 31.4% girls were PP with BMI SDS values above 1 in the PT group;                                                                                                                                             |

|                          |           |                             |                       |                                 |                       |         |                                                                                                               |                                                                                                                                                                                                                   |                                                                                                                                                                                                                                            |
|--------------------------|-----------|-----------------------------|-----------------------|---------------------------------|-----------------------|---------|---------------------------------------------------------------------------------------------------------------|-------------------------------------------------------------------------------------------------------------------------------------------------------------------------------------------------------------------|--------------------------------------------------------------------------------------------------------------------------------------------------------------------------------------------------------------------------------------------|
| Dai YL <i>et al.</i>     | 2009-2010 | 8895 girls<br><br>9812 boys | 6-18 years            | Chinese                         | Cross-sectional study | China   | Chinese Working Group on Obesity, Overweight: BMI $\geq$ 85th percentile; Obesity: BMI $\geq$ 95th percentile | tertiles on the timing of breast and testicular Tanner stage 2 or more (early-maturing group: earliest tertile; non-early-maturing: average and late maturers)                                                    | Median age of B2 was 9.69 years; Median age of G2 was 11.25 years; OR and 95% CIs for overweight were 1.48 (1.22–1.79) for boys and 2.64 (2.16–3.23) for girls, and for obesities were 1.61 (1.22–2.11) and 3.49 (2.59–4.70), respectively |
| Davison KK <i>et al.</i> | -         | 181 girls                   | 5-9 years             | -                               | Longitudinal study    | America | American 2000 CDC criteria: BMI percentiles                                                                   | At 9 years: estradiol levels; breast Tanner stage 3; pubertal Development Scale Testicular volume > 4 ml; advanced bone age > 1 year above chronological age; pubertal LH peak values; serum testosterone levels; | BMI percentile was 79.6 and 59.4 in earlier puberty and later puberty girls                                                                                                                                                                |
| Lee HS <i>et al.</i>     | 2003-2010 | 104 boys                    | Mean age of 8.7 years | Korean                          | Cohort study          | Korea   | Overweight: BMI $\geq$ 85th percentile; Obesity: BMI $\geq$ 95th percentile                                   | Overweight: BMI $\geq$ 85th percentile; Obesity: BMI $\geq$ 95th percentile                                                                                                                                       | Testicular volume was 6.8 ml (normal weight), 5.9 ml (overweight) and 6.1 ml (obesity)                                                                                                                                                     |
| Lee JM <i>et al.</i>     | 1991      | 401 boys                    | 2-11.5 years          | White (79.5%); Nonwhite (20.5%) | Longitudinal study    | America | Overweight: BMI $\geq$ 85th percentile; Obesity: BMI $\geq$ 95th percentile                                   | Genitalia Tanner stage 2 before age 11.5 years                                                                                                                                                                    | 49 boys (12.2%) were prepubertal at age 11.5 years by Tanner genitalia staging                                                                                                                                                             |

|                             |                       |                       |                |                                                                            |                                           |         |                                                                                           |                                                                                                    |                                                                                                                                                                                                       |
|-----------------------------|-----------------------|-----------------------|----------------|----------------------------------------------------------------------------|-------------------------------------------|---------|-------------------------------------------------------------------------------------------|----------------------------------------------------------------------------------------------------|-------------------------------------------------------------------------------------------------------------------------------------------------------------------------------------------------------|
| Rosenfield RL <i>et al.</i> | 1988-1994             | -                     | 8- 18 years    | Non-Hispanic white, non-Hispanic black, Mexican American                   | Cross-sectional study                     | America | normal BMI (10th–84th percentile); excessive BMI (85th percentile)                        | Thelarche stage 2; pubarche stage 3; menarche                                                      | The median age were 10.81 and 9.79 of breast stage 2, 11.57 and 11.39 of pubarche stage 3, 12.57 and 12.06 of menarche in normal and excessive BMI group respectively;                                |
| Sorensen K <i>et al.</i>    | 1991–1993; 2006–2008; | 1528 boys             | 5.8-19.8 years | Caucasian origin                                                           | Cross-Sectional study; Longitudinal study | Denmark | American 2000 CDC criteria, Overweight: BMI≥85th percentile; Obesity: BMI≥95th percentile | Testicular volume > 3 ml; genital stages 2 (G2);pubic hair stages 2 (PH2)                          | Median age of G2 was 11.83 years in 1991 and 11.59 years in 2006; Median age of PH2 was 11.89 years in 1991 and 12.38 years in 2006; Median age of TV was 11.92 years in 1991 and 11.66 years in 2006 |
| Wang Y <i>et al.</i>        | 1988-1994             | 1501 girls; 1520 boys | 8-14 years     | Non-Hispanic white (25%), non-Hispanic black (36%), Mexican American (35%) | Cross-sectional study                     | America | American 2000 CDC criteria, Overweight: BMI≥85th percentile; Obesity: BMI≥95th percentile | Girls: breast Tanner stage 2; Boys: genitalia stage 3, earlier than the median age for that stage. | Prevalence of overweight in 23% boys and 34% girls with early mature; 7% boys and 16% girls for obesity with early mature;                                                                            |
